# Supplementary material
Source: HighWire-hosted journal article supplement (https://www.annfammed.org/highwire/filestream/617/field_highwire_adjunct_files/0/Guck_Supp_App.pdf)
Supplement: Guck_Supp_App.pdf [file Guck_Supp_App.pdf]

**Supplemental materials for:**

Guck TP, Potthoff MR, Walters RW, Doll J, Greene MA, DeFreece T. Improved outcomes associated with interprofessional collaborative practice. *Ann Fam Med.* 2019;17(Suppl 1):S82.

**Author affiliations**

Thomas P. Guck, PhD<sup>1</sup>

Meghan R. Potthoff, PhD, APRN<sup>2</sup>

Ryan W. Walters, PhD<sup>3</sup>

Joy Doll, OTD, OTR/L<sup>4</sup>

Michael A. Greene, MD<sup>1,5</sup>

Todd DeFreece, JD, MHA, MBA<sup>5,6</sup>

<sup>1</sup>Department of Family Medicine, School of Medicine, Creighton University, Omaha, Nebraska

<sup>2</sup>College of Nursing, Creighton University, Omaha, Nebraska

<sup>3</sup>Department of Medicine, School of Medicine, Creighton University, Omaha, Nebraska

<sup>4</sup>School of Pharmacy and Health Professions, Creighton University, Omaha, Nebraska

<sup>5</sup>CHI Health Creighton University Medical Center – University Campus, Omaha, Nebraska

<sup>6</sup>Creighton University, Omaha, Nebraska

---

**Supplemental Table 1. Demographic Characteristics (N = 276)**

---

|                           |            |
|---------------------------|------------|
| Age, y [range]            | 53 [35-64] |
| Male, No. (%)             | 116 (42.0) |
| Race, No. (%)             |            |
| White                     | 92 (33.3)  |
| Black                     | 106 (38.4) |
| Asian                     | 65 (23.6)  |
| Other                     | 13 (4.7)   |
| English language, No. (%) | 196 (71.0) |
| Refugee, No. (%)          | 79 (28.6)  |
| Primary Payer, No. (%)    |            |
| Medicare                  | 77 (27.9)  |
| Traditional               | 43 (15.6)  |
| Private                   | 34 (12.3)  |
| Medicaid                  | 85 (30.8)  |
| Commercial                | 57 (20.7)  |
| Uninsured                 | 57 (20.7)  |

---

Note. Age is presented as median and interquartile range.

---

---

**Supplemental Table 2. Statistical Comparisons of All Outcomes**

---

|                           | <b>2016</b>            | <b>2017</b>          |                 |
|---------------------------|------------------------|----------------------|-----------------|
|                           | <b>[95% CI]</b>        | <b>[95% CI]</b>      | <b><i>p</i></b> |
| ≥1 ED Visit, %            | 89.7 [82.6-94.1]       | 73.0 [63.2-81.0]     | <.001           |
| ≥1 Hospital Visit, %      | 37.8 [31.8-44.2]       | 20.1 [15.6-25.6]     | <.001           |
| A1c, %                    | 10.3 [9.9-10.7]        | 9.5 [9.1-9.9]        | 0.001           |
| Total Patient Charges, \$ | 18,491 [15,274-22,386] | 9,572 [7,907-11,588] | <.001           |

*Note.* All statistical tests accounted for the nesting of patients within year. Due to skewed data distributions, total patient charges and their respective 95% CIs were estimated using a log-linear model.

---

**Key words:** interprofessional education; collaborative practice; patient outcomes; primary care; medical residency

**Acknowledgements:** The authors express our heartfelt gratitude for the dedicated, engaged, and highly professional IPCP team at ACC. We appreciate the support of colleagues Kristy Brandon, PT, DPT, Amy McGaha, MD, and Michael White, MD.

**Funding/Support:** Partially funded by the National Center for Interprofessional Practice and Education in partnership with the Robert Wood Johnson Foundation, the John A. Hartford Foundation, the Josiah Macy Jr. Foundation and the Gordon and Betty Moore Foundation. Potthoff, M. (PI); Co Investigators: Doll, J., McCafferty, K., Jensen, G., Lappe, J., DeFreece, T., & Walters, R. Cultivating Collaboration: Building a Successful Collaborative Care Model in an Academic Health Partnership. Accelerating Interprofessional Community-Based Education and Practice.

**Ethical Approval:** This study was approved by the Institutional Review Board of Creighton University, Reference Number 104695-2, Date: 6/20/2017.

**Previous Presentations:** A portion of this work was presented at Nexus Summit: July 29 - 31, 2018 Minneapolis, MN. Creating Results: Interprofessional Vision to Action.

## References

1. Lutifyya MN, Brandt B, Delaney C, Pechacek C, Cerra F. Setting a research agenda for interprofessional education and collaborative practice in the context of United States health system reform. *J Interprof Care*. 2016;30:7-14.
2. Townsend, CS, McNulty M, Grillo-Peck, A. Implementing huddles improves care coordination in an academic health center. *Prof Case Manage*. 2017;22:29–35.
3. Fiscella, K, McDaniel, SH. The complexity, diversity, and science of primary care teams. *Am Psych*. 2018;78:451-467.
4. Brandt BF, Lutiyya, MN, King, JA, Chioreso C. A scoping review of interprofessional collaborative practice and education using the lens of the triple aim. *J Interprof Care*. 2014;28:393-399.
5. Reiss-Brennan B, Brunisholz K, Dredge C, Briot P, Grazier K, Wilcox A, Savitz L, James B. Association of integrated team-based care with health care quality, utilization, and cost. *JAMA*. 2016;316:826-834.
6. Gaglioti AH, Barlow P, Thoma, KD, Bergus GR. Integrated care coordination by an interprofessional team reduces emergency department visits and hospitalisations at an academic health centre. *J of Interprof Care*. 2017;31:557-565. doi:
7. Moffett ML, Kaufman A, Bazemore A. Community health workers bring cost savings to patient-centered medical homes. *J Community Health*. 2018;43(1):1-3.
